# Supplementary material for: Micro-scale spatial location engineering of COF–TiO2 heterojunctions for visible light driven photocatalytic alcohol oxidation
Source: Royal Society of Chemistry journal article supplement (doi:10.1039/d0ta06442d), 2020-01-01
Supplement: d0ta06442d1.pdf [file d0ta06442d1.pdf]

## Supporting information

# Micro-scale spatial location engineering of COF-TiO<sub>2</sub> heterojunctions for visible light driven photocatalytic alcohol oxidations

He Li,<sup>a</sup> Haoran Liu,<sup>a,c</sup> Chunzhi Li,<sup>a,b</sup> Jiali Liu,<sup>a,b</sup> Jian Liu,<sup>a</sup> Qihua Yang<sup>a,\*</sup>

<sup>a</sup>State Key Laboratory of Catalysis, Dalian Institute of Chemical Physics, Chinese Academy of Sciences, Dalian 116023, China

<sup>b</sup>University of Chinese Academy of Sciences, Beijing 100049, China

<sup>c</sup>Key Laboratory of Theoretical Organic Chemistry and Functional Molecule (Ministry of Education), School of Chemistry and Chemical Engineering, Hunan University of Science and Technology, Xiangtan 411201, China

### Corresponding author:

E-mail: yangqh@dicp.ac.cn (Q. Yang).

## Characterizations

Liquid  $^1\text{H}$  NMR spectra were recorded on a Bruker Avance 400 MHz spectrometer. Solid-state  $^{13}\text{C}$  CP TOSS (total suppression of spinning sidebands) spectrum was tested on a Bruker 600 MHz spectrometer. FT-IR spectra in the range of 400 to  $4000\text{ cm}^{-1}$  were collected with a Nicolet Nexus is50 IR spectrometer using KBr pellets. Powder X-ray diffraction (PXRD) patterns were recorded with a Rigaku RINT D/Max-2500 powder diffraction system using  $\text{Cu K}\alpha$  radiation. TGA was performed from 30 to  $1000\text{ }^\circ\text{C}$  with a heating rate of  $5\text{ }^\circ\text{C min}^{-1}$ , using a NETZSCHSTA 449F3 analyzer under air atmosphere. Nitrogen sorption isotherms were collected by using a Micromeritics ASAP 2020 system volumetric adsorption analyzer at 77 K. Before the sorption measurements, the samples were fully-degassed under 373 K for 6 h. The BET surface area was calculated from the adsorption data at a relative pressure  $P/P_0$  in the range of 0.04 to 0.20. Pore size distributions were determined from the adsorption branch using a nonlocal density functional theory (NLDFT) method. TEM images were taken with a Hitachi 7700, at an acceleration voltage of 100 kV. Scanning electron microscopy (SEM) images were collected using a ZEISS SUPRA 55 field emission SEM. High-resolution scanning electron microscopy (HR-SEM) was undertaken by using a HITACHI S5500 apparatus operating at an acceleration voltage of 30 kV. FE-SEM-EDS elemental mapping was conducted by using a JSM-7900F field emission SEM. The photodeposition Pt nanoparticles was carried out by using a 300 W Xe lamp (Ushio-CERMAX LX300) and optical cutoff filter (kenko, L42;  $\lambda \geq 420\text{ nm}$ ) for 3 hours with a Pt loading amount of 3 wt.% in 4 mL TEOA aqueous solution (15 vol%). STEM image and elemental mappings were taken on a JEOL JEM-ARM200F STEM. UV-vis absorption spectra were recorded on SHIMADZU UV-vis 2550 spectrophotometer. The photoluminescence (PL) spectra were conducted on a Fluoromax-4 spectrophotometer. The electrochemical impedance spectra (EIS), Mott-Schottky plots and photocurrent-time (I-T) profiles were measured by an electrochemical workstation (CHI660D, Shanghai, China) on a three-electrode system. In detail, Pt and saturated mercury electrode (SCE) electrode were used as counter electrode and reference electrode respectively, and  $\text{Na}_2\text{SO}_4$  (0.2 M) was used as the electrolyte solution. A 300 W Xe lamp ( $\lambda \geq 420\text{ nm}$ ) was used as the light source during the photocurrent-time (I-T) test. The EIS results were recorded over a frequency range of  $0.01\text{--}10^5$

Hz with an amplitude of 6 mV at the same bias voltages. Electron paramagnetic resonance (EPR) spectra were collected on a Bruker EPR A200 spectrometer under air at 298 K.

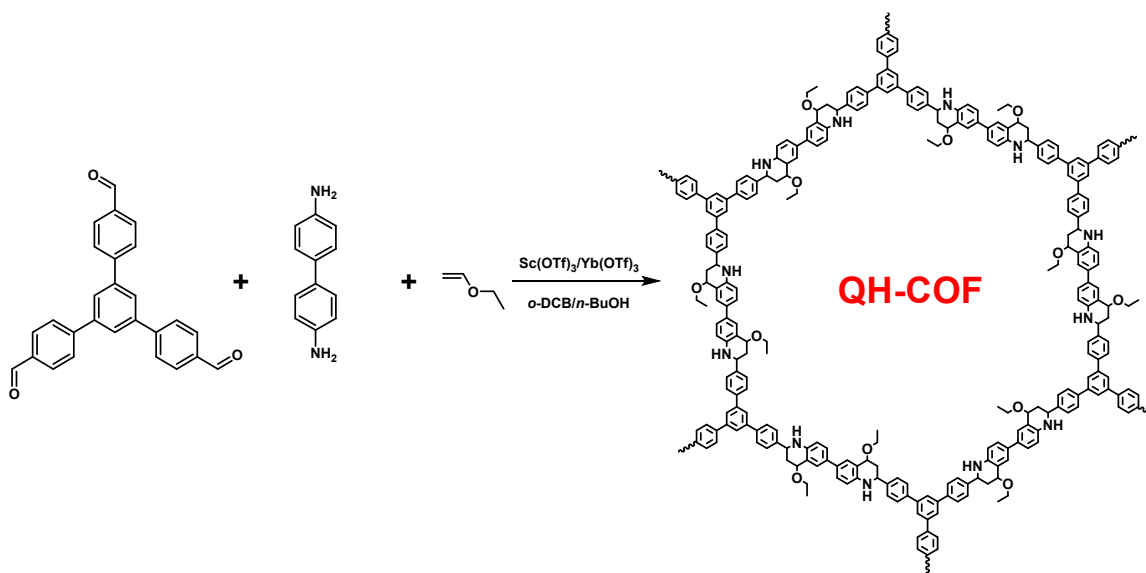

**Scheme S1.** Schematic illustration for the synthesis of QH-COF.

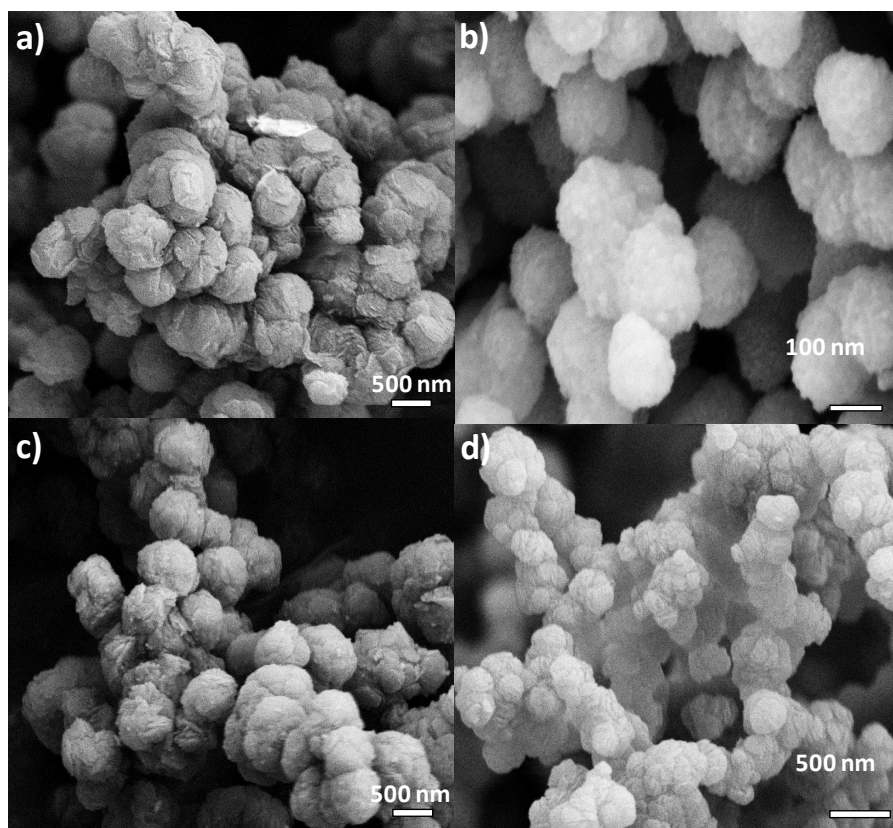

**Figure S1.** SEM images of (a) QH-COF, (b) TiO<sub>2</sub>, (c) QH-COF@TiO<sub>2</sub>(10%) and (d) TiO<sub>2</sub>(10%)@QH-COF.

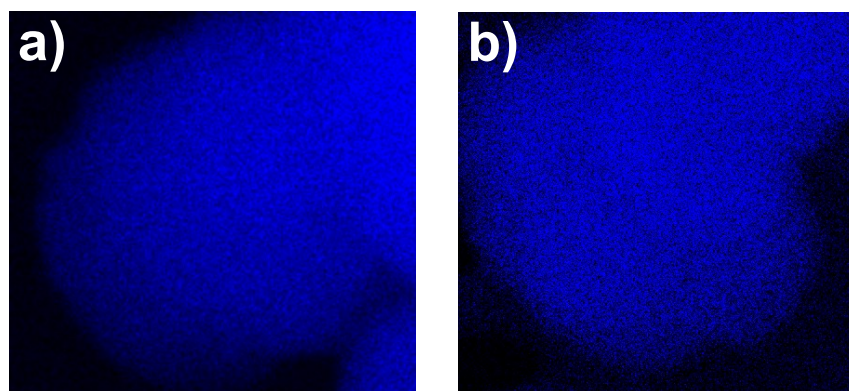

**Figure S2.** FE-SEM-EDS elemental mapping for C of (a) QH-COF@TiO<sub>2</sub>(10%) and (b) TiO<sub>2</sub>(10%)@QH-COF.

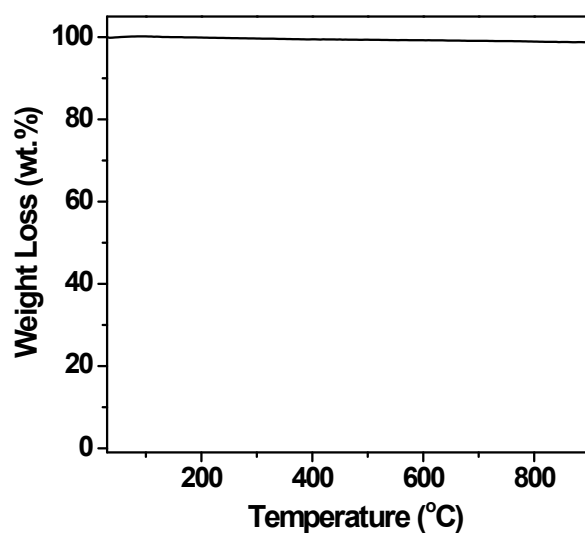

**Figure S3.** TGA curve of QH-COF@TiO<sub>2</sub>(10%) after calcination in air (measured under air atmosphere).

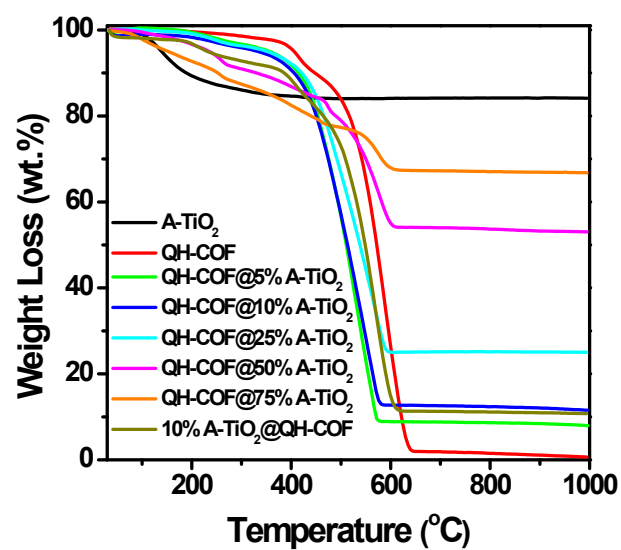

**Figure S4.** TGA curves under air atmosphere.

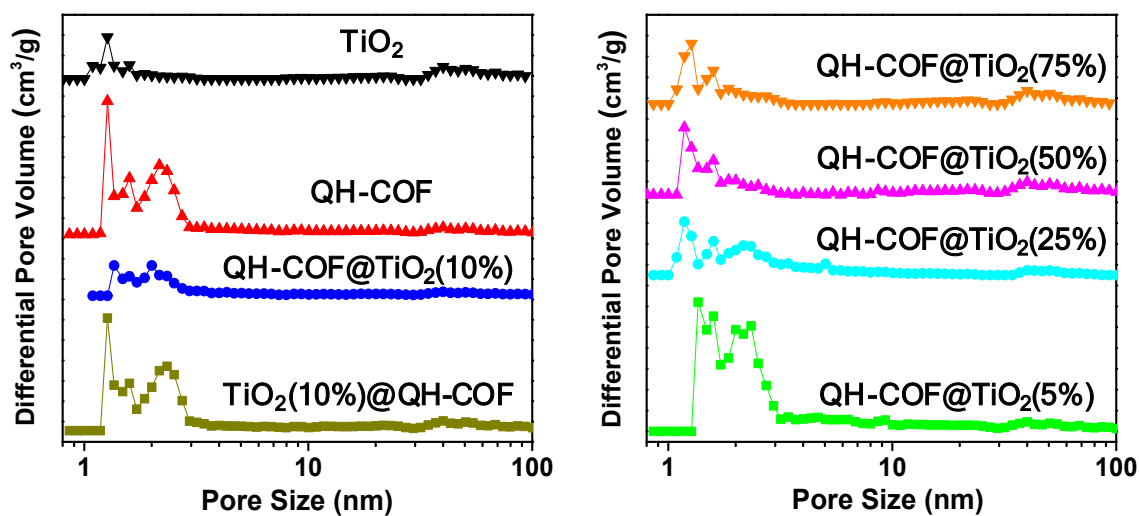

**Figure S5.** NLDFT pore size distribution curves.

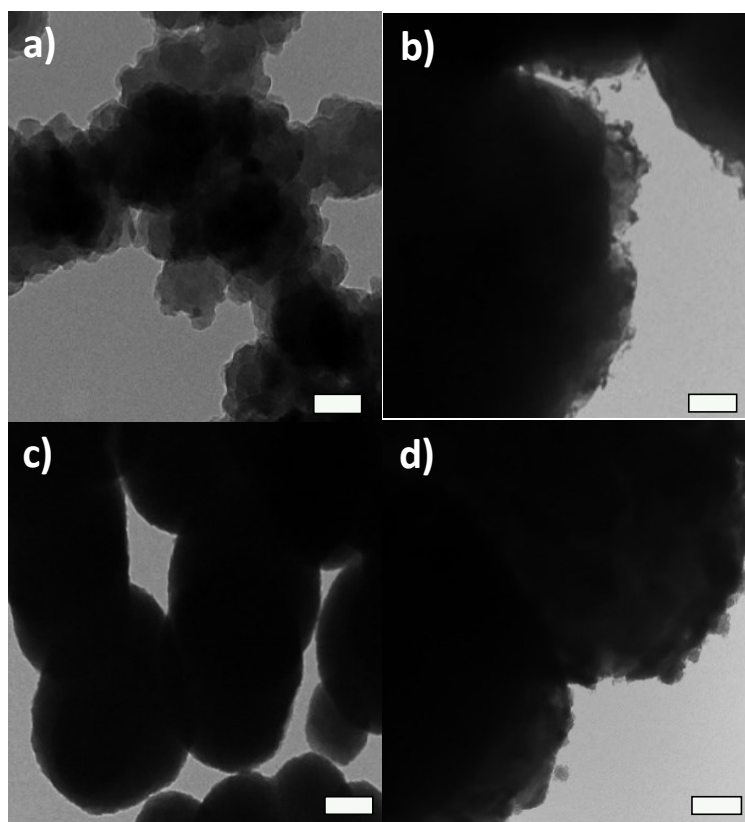

**Figure S6.** TEM pictures of (a) QH-COF@TiO<sub>2</sub>(5%), (b) QH-COF@TiO<sub>2</sub>(25%), (c) QH-COF@TiO<sub>2</sub>(50%) and (d) QH-COF@TiO<sub>2</sub>(75%) (Scale bar: 100 nm).

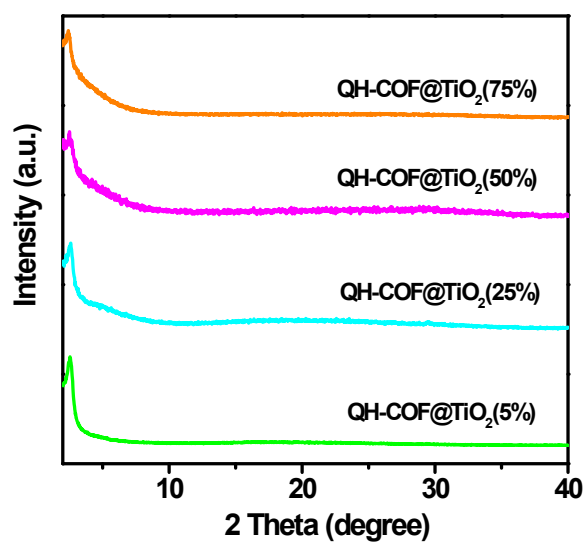

**Figure S7.** PXRD patterns of QH-COF@TiO<sub>2</sub> photocatalysts.

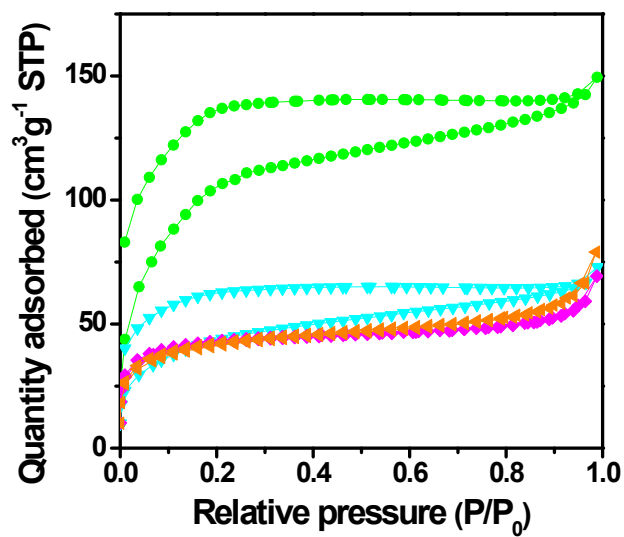

**Figure S8.** N<sub>2</sub> sorption isotherms of QH-COF@TiO<sub>2</sub>(5%) (green), QH-COF@TiO<sub>2</sub>(25%) (cyan), QH-COF@TiO<sub>2</sub>(50%) (magenta) and QH-COF@TiO<sub>2</sub>(75%) (orange).

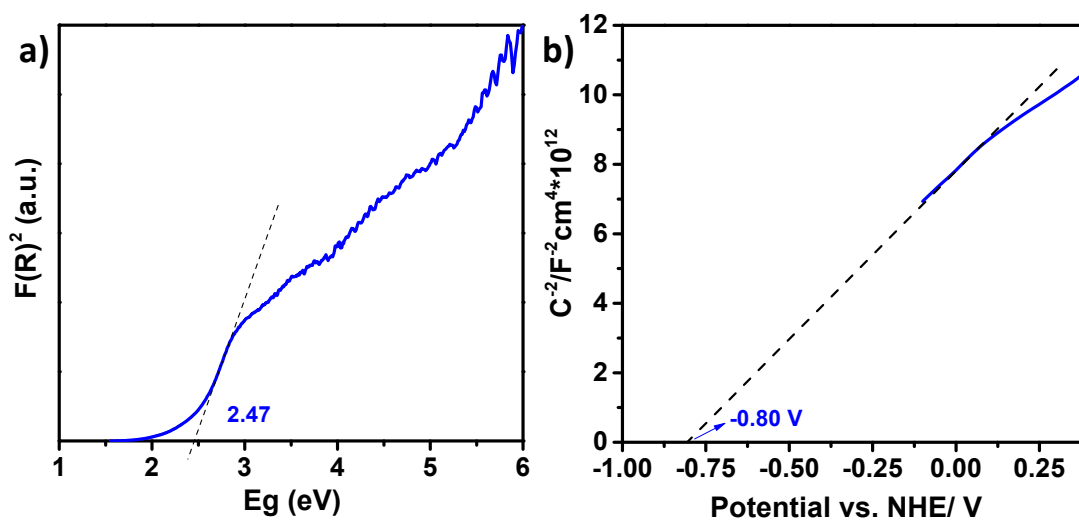

**Figure S9.** (a) Tauc plot and (b) Mott-Schottky plot of QH-COF@TiO<sub>2</sub>(10%).

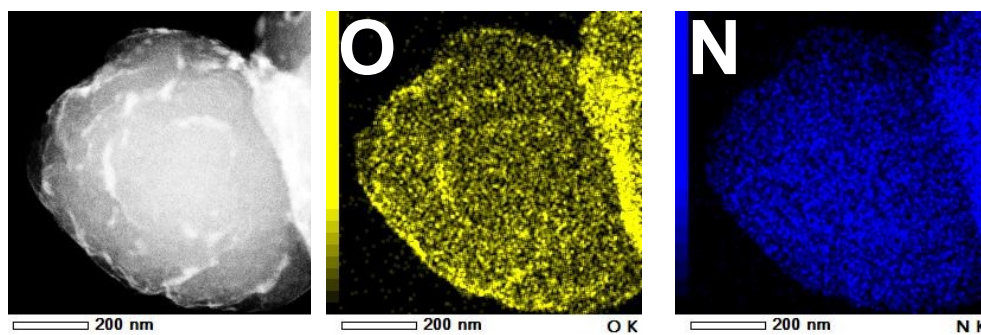

**Figure S10.** STEM image and elemental mappings of QH-COF@TiO<sub>2</sub>(10%) after photo-deposition with Pt.



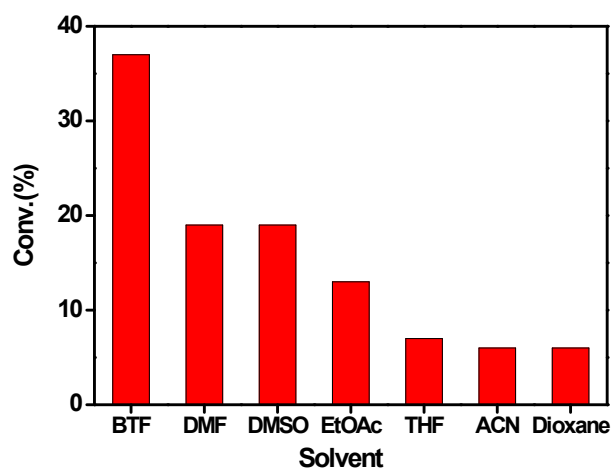

**Figure S11.** Visible light induced photocatalytic performance of QH-COF in oxidation for selective conversion of benzyl alcohol in different solvents. Reaction conditions: benzyl alcohol (0.05 mmol), Solvents (1 mL), QH-COF (16 mg), O<sub>2</sub> (1 bar), reaction time 2 h, 300W Xe lamp ( $\lambda \geq 420$  nm).

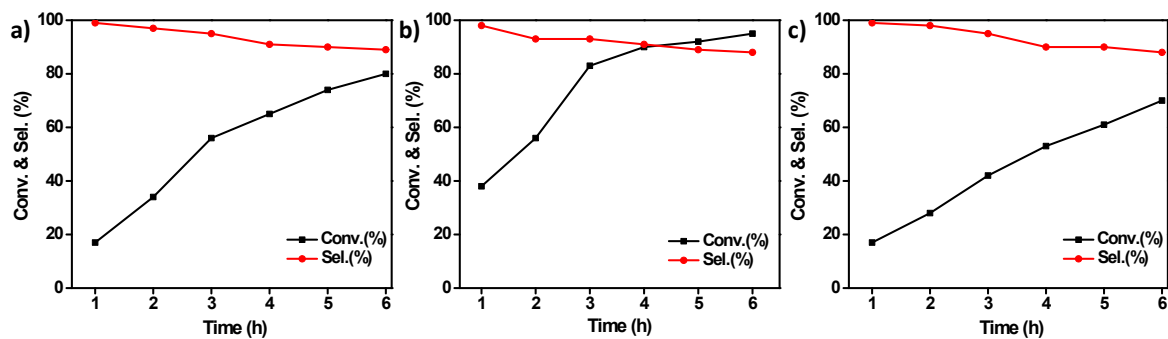

**Figure S12.** Kinetic curves for the photocatalytic oxidation of benzyl alcohol catalyzed by (a) QH-COF, (b) QH-COF@TiO<sub>2</sub>(10%) and (c) TiO<sub>2</sub>(10%)@QH-COF.

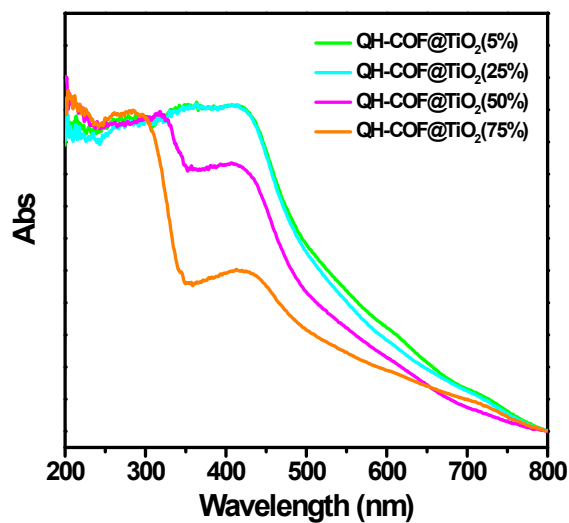

**Figure S13.** UV-vis diffuse reflectance spectra of QH-COF@TiO<sub>2</sub> photocatalysts.

**Table S1.** The comparison of results for the photocatalytic oxidation of benzyl alcohol activities over different COFs and MOFs reported in the literatures.

| Photocatalyst                                           | Solvent | Irradiance<br>(nm) | Selectivity<br>(%) | Reaction rate<br>(mmol·g <sup>-1</sup> ·h <sup>-1</sup> ) | Ref.      |
|---------------------------------------------------------|---------|--------------------|--------------------|-----------------------------------------------------------|-----------|
| QH-COF                                                  | BTF     | ≥ 420              | 95                 | 0.58                                                      | This work |
| QH-COF@TiO <sub>2</sub> (10%)                           | BTF     | ≥ 420              | 93                 | 1.19                                                      | This work |
| NH <sub>2</sub> -MIL-125-Ti                             | BTF     | ≥ 420              | >99                | 0.075                                                     | S1        |
| Ni-NH <sub>2</sub> -MIL-125-Ti                          | BTF     | ≥ 420              | >99                | 0.129                                                     | S1        |
| MIL-100 (Fe)                                            | Toluene | ≥ 420              | 100                | 0.083                                                     | S2        |
| MIL-125/C <sub>3</sub> N <sub>4</sub>                   | EtOH    | > 400              | 93                 | 0.93                                                      | S3        |
| TAPB-PDA COF                                            | ACN     | > 420              | >99                | 0.02                                                      | S4        |
| NH <sub>2</sub> -MIL-125@TAPB-PDA                       | ACN     | > 420              | >99                | 0.5                                                       | S4        |
| Cu/Cu@UiO-66                                            | ACN     | ≥ 400              | >99                | 1.031                                                     | S5        |
| UiO-66 (NH <sub>2</sub> )                               | BTF     | ≥ 420              | >99                | 0.66                                                      | S6        |
| TiO <sub>2</sub> @NH <sub>2</sub> -MIL-125-Ti<br>(LP-3) | BTF     | ≥ 420              | 99                 | 0.21                                                      | S7        |
| TiO <sub>2</sub> @COF-3                                 | ACN     | > 420              | >99                | 0.44                                                      | S8        |
| CdS-UiO66                                               | BTF     | ≥ 420              | >99                | 0.94                                                      | S9        |

**Table S2.** CDC reactions of N-phenyl-1,2,3,4-tetrahydroisoquinoline over various catalysts.

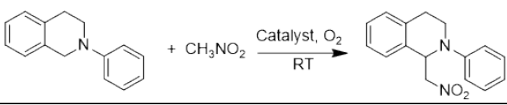

| Catalyst                      | Light | Atmosphere     | Yield (%) |
|-------------------------------|-------|----------------|-----------|
| QH-COF                        | -     | O <sub>2</sub> | 5         |
| \                             | +     | O <sub>2</sub> | \         |
| QH-COF                        | +     | N <sub>2</sub> | 13        |
| QH-COF                        | +     | O <sub>2</sub> | 53        |
| TiO <sub>2</sub>              | +     | O <sub>2</sub> | 10        |
| QH-COF@TiO <sub>2</sub> (10%) | +     | O <sub>2</sub> | 81        |
| TiO <sub>2</sub> (10%)@QH-COF | +     | O <sub>2</sub> | 73        |

Reaction conditions: N-phenyl-1,2,3,4-tetrahydroisoquinoline (0.2 mmol), nitromethane (2 mmol), methanol (4 mL), catalyst (10 mg), room temperature for 12 h, 1 bar of O<sub>2</sub>, irradiation by a green LED lamp. The yield was determined by <sup>1</sup>H NMR spectroscopy using 1,3,5-trimethoxybenzene as an internal standard.

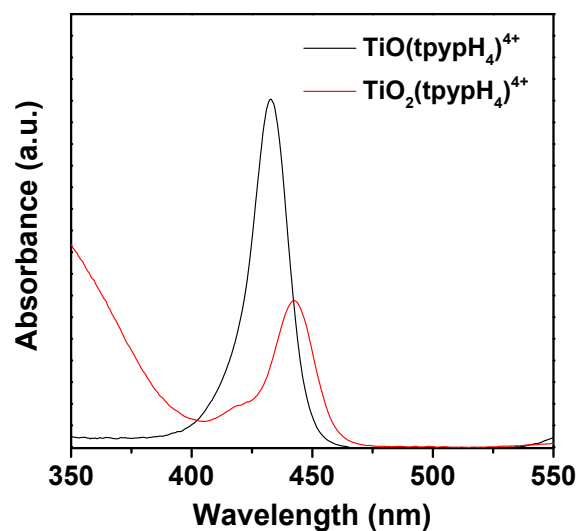

**Figure S14.** UV-vis spectra of fresh  $\text{TiO}(\text{tpypH}_4)^{4+}$  and the mixture of  $\text{TiO}(\text{tpypH}_4)^{4+}$  with the supernatant from the photocatalytic CDC reaction catalyzed by QH-COF@ $\text{TiO}_2$ (10%).

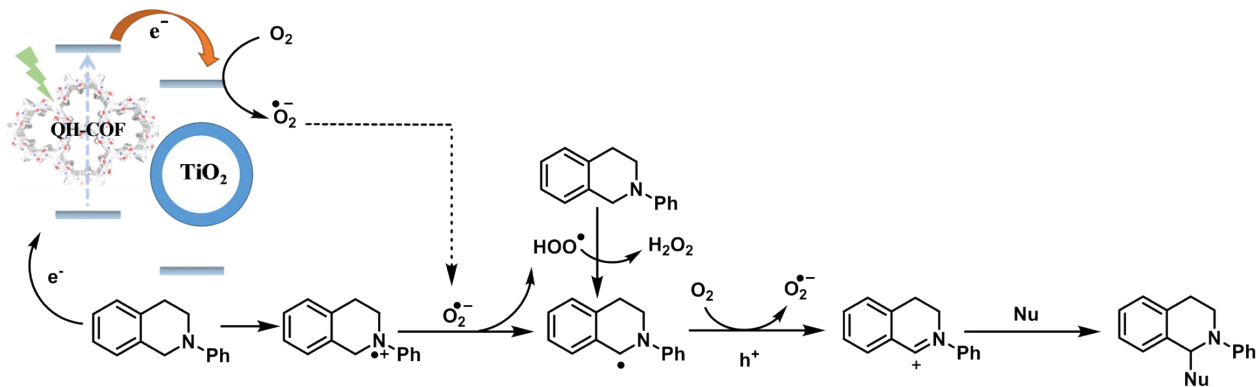

**Scheme S2.** Proposed mechanism for the photocatalytic aerobic CDC reaction of N-phenyl-1,2,3,4-tetrahydroisoquinoline and nucleophile in the presence of QH-COF@ $\text{TiO}_2$ (10%).

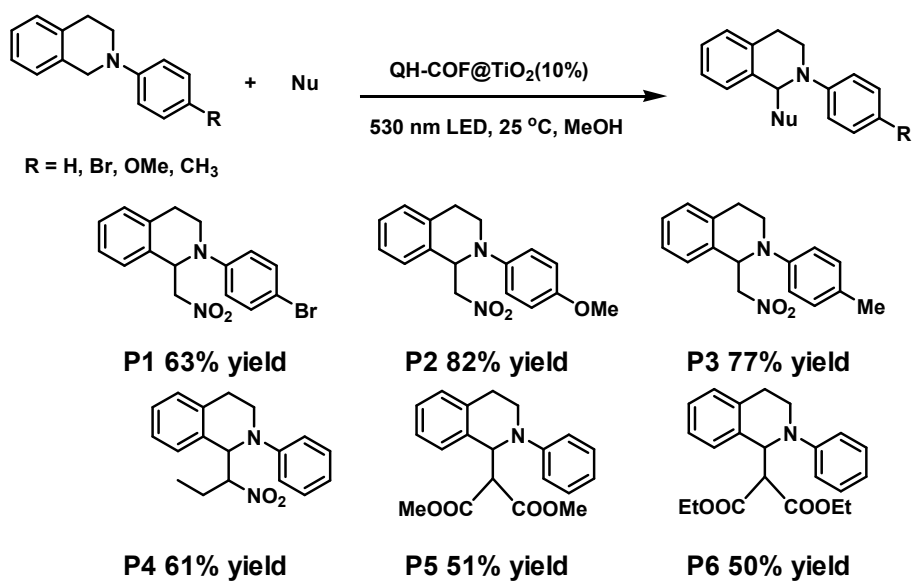

**Figure S15.** The substrate scope of photoreductive dehalogenation reactions over QH-COF@TiO<sub>2</sub>(10%) (P1-P3: 12 h, P4-P6: 18 h).

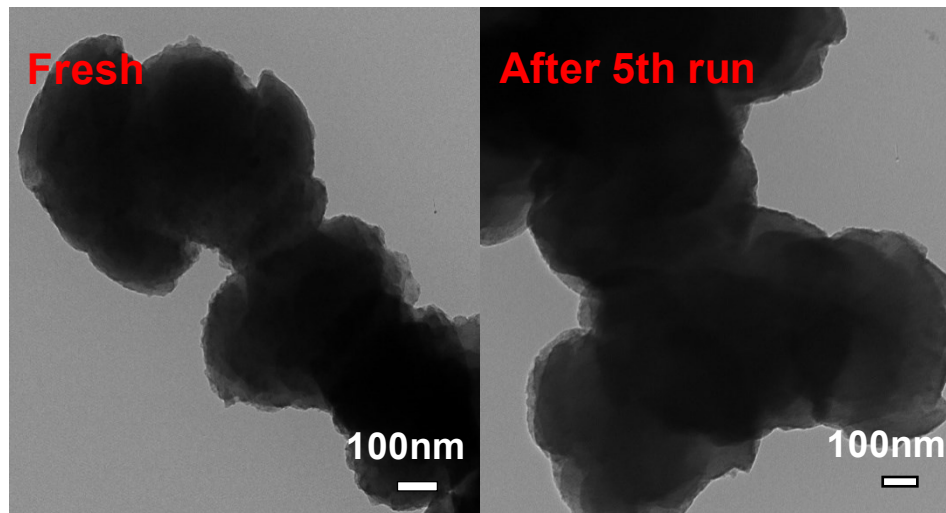

**Figure S16.** TEM images of fresh and recovered QH-COF@TiO<sub>2</sub>(10%).

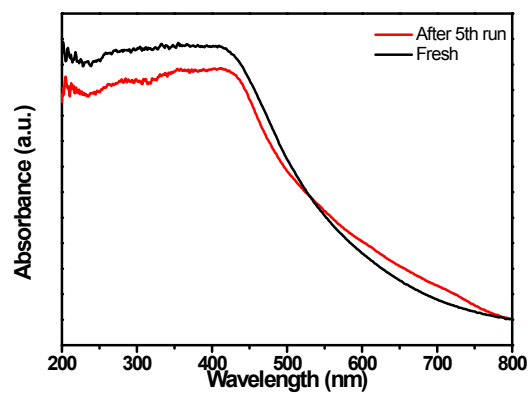

**Figure S17.** UV-Vis spectra of fresh and recovered QH-COF@TiO<sub>2</sub>(10%).

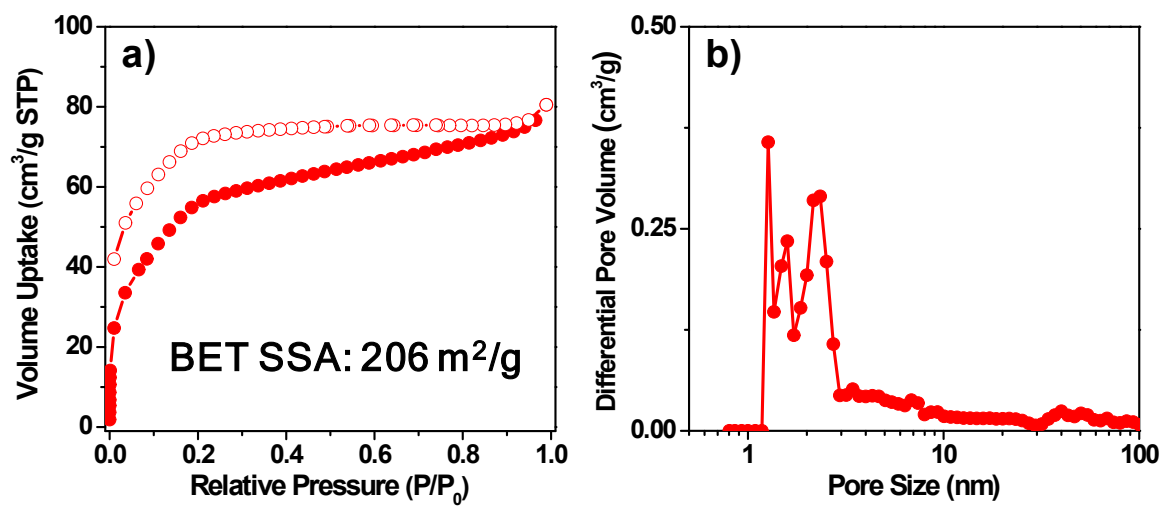

**Figure S18.** (a) N<sub>2</sub> sorption isotherms (measured at 77 K) and (b) NLDFT pore size distribution curve of recovered QH-COF@TiO<sub>2</sub>(10%).

## References for supporting information

- [S1] Y. Fu, L. Sun, H. Yang, L. Xu, F. Zhang, W. Zhu, *Appl. Catal. B*, 2016, **187**, 212-217.
- [S2] F. Ke, L. Wang, J. Zhu, *Nano Res.*, 2015, **8**, 1834-1846.
- [S3] Z. Yang, X. Xu, X. Liang, C. Lei, Y. Cui, W. Wu, Y. Yang, Z. Zhang, Z. Lei, *Appl. Catal. B*, 2017, **205**, 42-54.
- [S4] G. Lu, X. Huang, Y. Li, G. Zhao, G. Pang, G. Wang, *J. Energy Chem.*, 2020, **43**, 8-15.
- [S5] L. Xiao, Q. Zhang, P. Chen, L. Chen, F. Ding, J. Tang, Y.-J. Li, C.-T. Au, S.-F. Yin, *Appl. Catal. B*, 2019, **248**, 380-387.
- [S6] L. Shen, S. Liang, W. Wu, R. Liang, L. Wu, *Dalton Trans.*, 2013, **42**, 13649-13657.
- [S7] X. Li, Y. Pi, Q. Hou, H. Yu, Z. Li, Y. Li, J. Xiao, *Chem. Commun.*, 2018, **54**, 1917-1920.
- [S8] G. Lu, X. Huang, Z. Wu, Y. Li, L. Xing, H. Gao, W. Dong, G. Wang, *Appl. Surf. Sci.*, 2019, **493**, 551-560.
- [S9] L. Shen, S. Liang, W. Wu, R. Liang, L. Wu, *J. Mater. Chem. A*, 2013, **1**, 11473-11482.
